# Supplementary material for: Tuning charcoal to functional reactive filter materials for groundwater defluoridation
Source: Royal Society of Chemistry journal article supplement (doi:10.1039/d2ew00798c), 2023-01-01
Supplement: d2ew00798c1.pdf [file d2ew00798c1.pdf]

## Supplementary Information

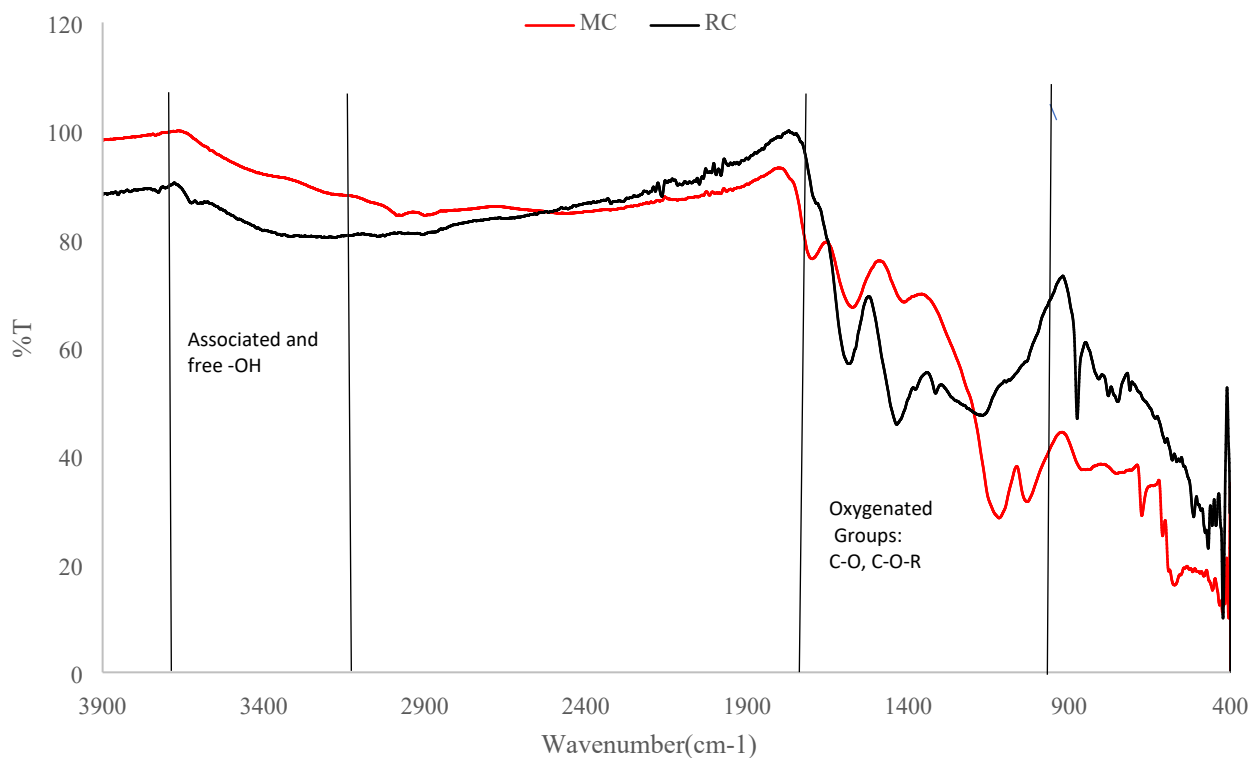

**Figure 1:** The FTIR spectra of raw and modified charcoal

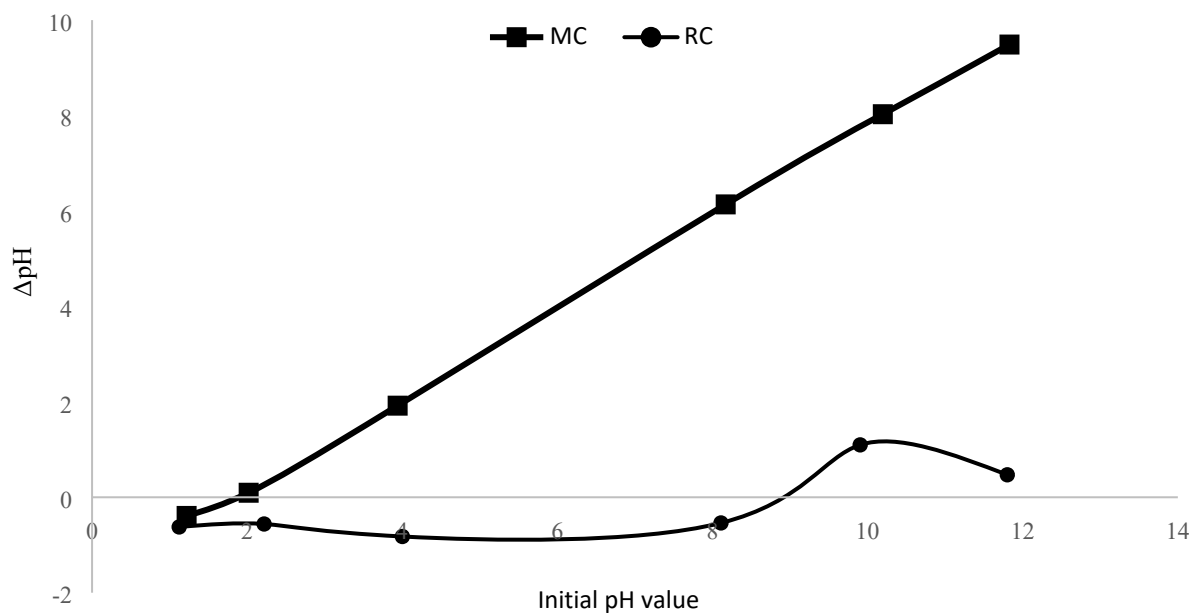

**Figure 2:** The results of the electrokinetic (pH<sub>PZC</sub>) analysis of the raw and modified charcoal

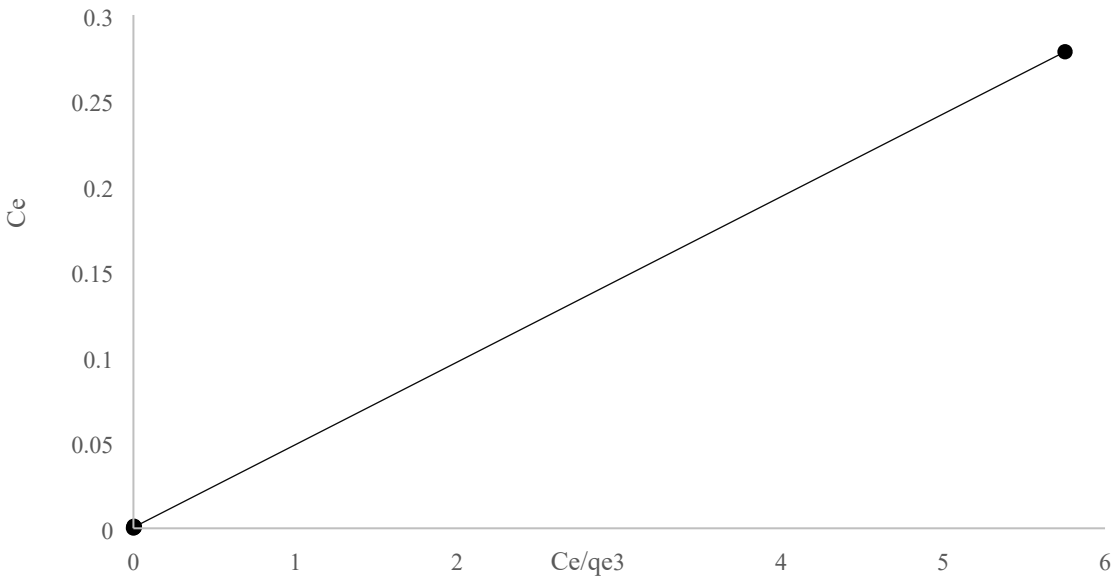

**Figure 3a:** Langmuir Equilibrium Isotherm Plot

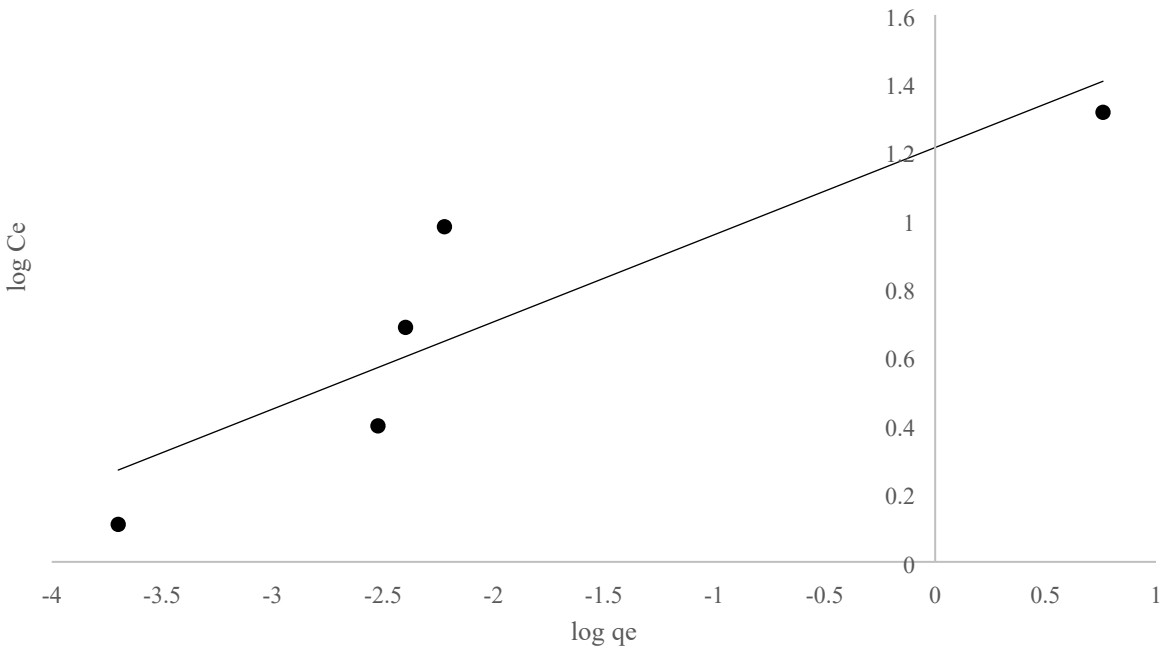

**Figure 3b:** Freundlich Equilibrium Isotherm Plot

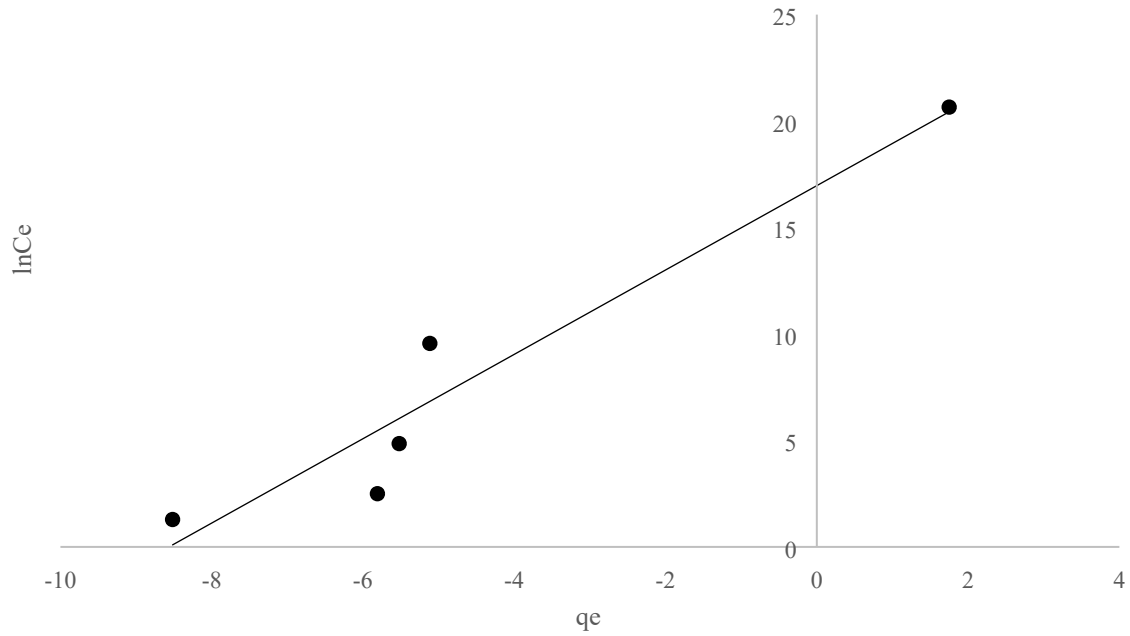

**Figure 3c:** Temkin Equilibrium Isotherm Plot

$$[F^-]_{TOT} = 2.63 \text{ M}$$

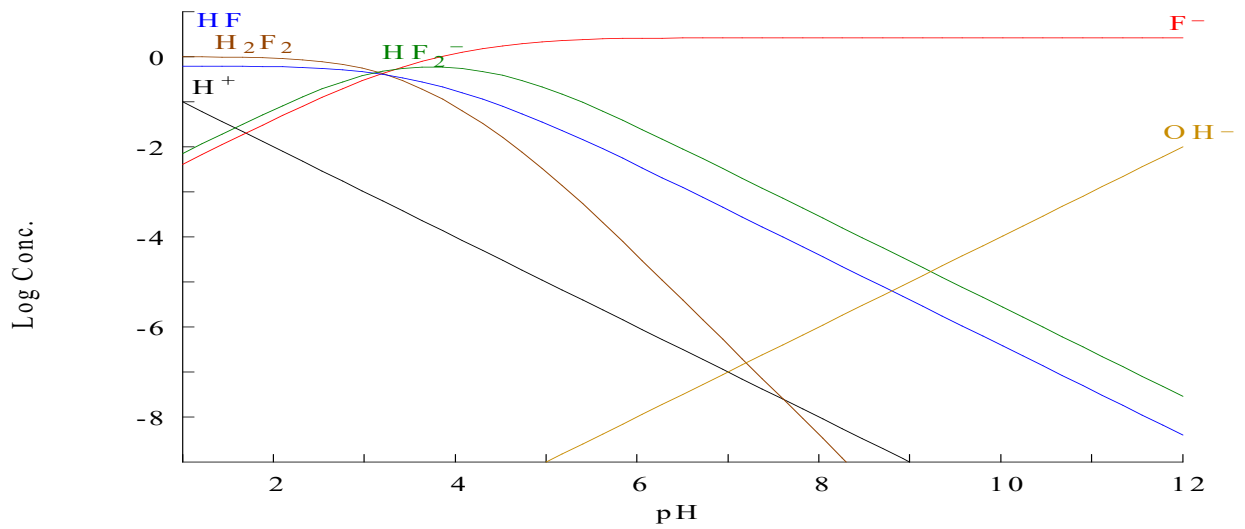

**Figure 4:** Hydrochemical equilibrium diagram of fluoride in the synthetic feedwater @50mg/L (i.e., 2.63M) fluoride solution
